# Supplementary material for: Navigation Between Stopovers by Greater White-Fronted Geese: Comparing Compass Mechanisms and Efficiency Benchmarks
Source: Research Square preprint supplement (doi:10.21203/rs.3.rs-8080422/v1), 2025-11-18
Supplement: Supplementary file 1 [file 5277a97626b3407b9e9dd1ee.docx]

**Additional file 1**

| 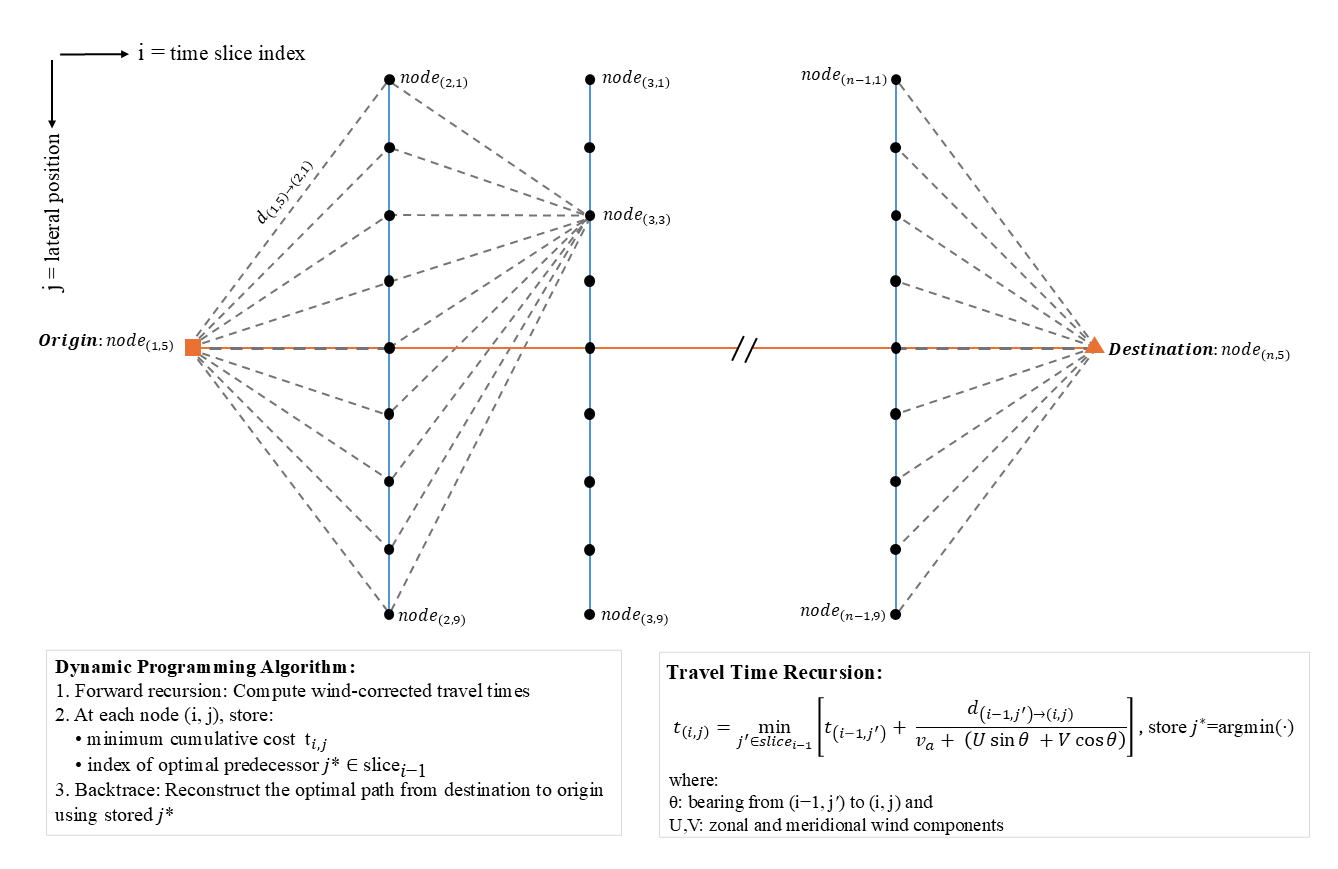 |
| --- |
| Fig. S1. Time-expanded graph used to compute global wind-optimal trajectories via dynamic programming. Nodes represent candidate positions spaced laterally at fixed intervals across discretised time slices along the great-circle arc connecting origin and destination (orange line). Transitions between adjacent time slices are evaluated based on wind-adjusted travel time, with wind vectors projected onto segment bearings. The algorithm stores cumulative cost and predecessor index at each node, and the minimum-time trajectory is recovered by backtracking from the destination. |

| Table S1. Simulated route types and inputs | | | | | |
| --- | --- | --- | --- | --- | --- |
| **Code** | **Route name** | **Class** | **Cue/knowledge** | **Initialisation** | **Update rule** |
| GL | Geographic loxodrome | Compass | True-north bearing | Set to observed departure bearing | Fixed geographic azimuth |
| ML | Geomagnetic loxodrome | Compass | Magnetic north | Observed magnetic bearing | Fixed magnetic azimuth; declination-corrected hourly |
| MC | Magnetoclinic | Compass | Apparent inclination | Set from departure heading & field | Maintain constant apparent dip using local I,D |
| SC | Sun compass (time-compensated) | Compass | Solar azimuth + clock | Departure sun (SR/SS or polar ref.) | Hourly correction for seasonal shift + longitudinal drift |
| LW | Local wind-aligned | Compass-like | Local wind direction | Observed start | Heading = wind direction each hour |
| WO | Global wind-optimal | Efficiency | Future wind field | Start & end points fixed | Dynamic programming min-time |
| GC | Great-circle | Efficiency | Destination geometry | Start & end | Geodesic propagation |

| Table S2. Trajectory-similarity metrics | | | | | |
| --- | --- | --- | --- | --- | --- |
| **Metric** | **Symbol** | **Type** | **Definition (summary)** | **Range/ units** | **Interpretation** |
| Median geodesic distance | MGD | Spatial | Median point-wise great-circle distance between temporally matched fixes | km (or m) | Lower = closer spatial alignment |
| Dynamic Time Warping | DTW | Spatio-temporal | DTW cost on coordinate sequences; allows phase/pace differences | arbitrary (km-scaled) | Lower = better path-shape match over time |
| Directional similarity | DIR | Directional | Mean cosine similarity of successive heading vectors | ([-1,1]) | Higher = more consistent headings |

| Table S3. Summary of migratory flight segment characteristics by season (values with ± are mean ± SD). | | |
| --- | --- | --- |
| **Metric** | **Spring** | **Autumn** |
| Flight segments (n) | 1137 | 387 |
| Initial direction (circular mean ± circular SD; ° from north) | 89 ± 89 | 232 ± 36 |
| Duration (h) | 40 ± 36 | 35 ± 34 |
| Cumulative distance (km) | 865 ± 537 | 733 ± 692 |
| Straightness index | 0.86 ± 0.15 | 0.92 ± 0.08 |
| Geomagnetic-storm exposure (% segments with Max Kp > 5) | 5.7% | 9.7% |
| Night-time departures (%; sun altitude < −6°) | 22.9% | 17.1% |

| 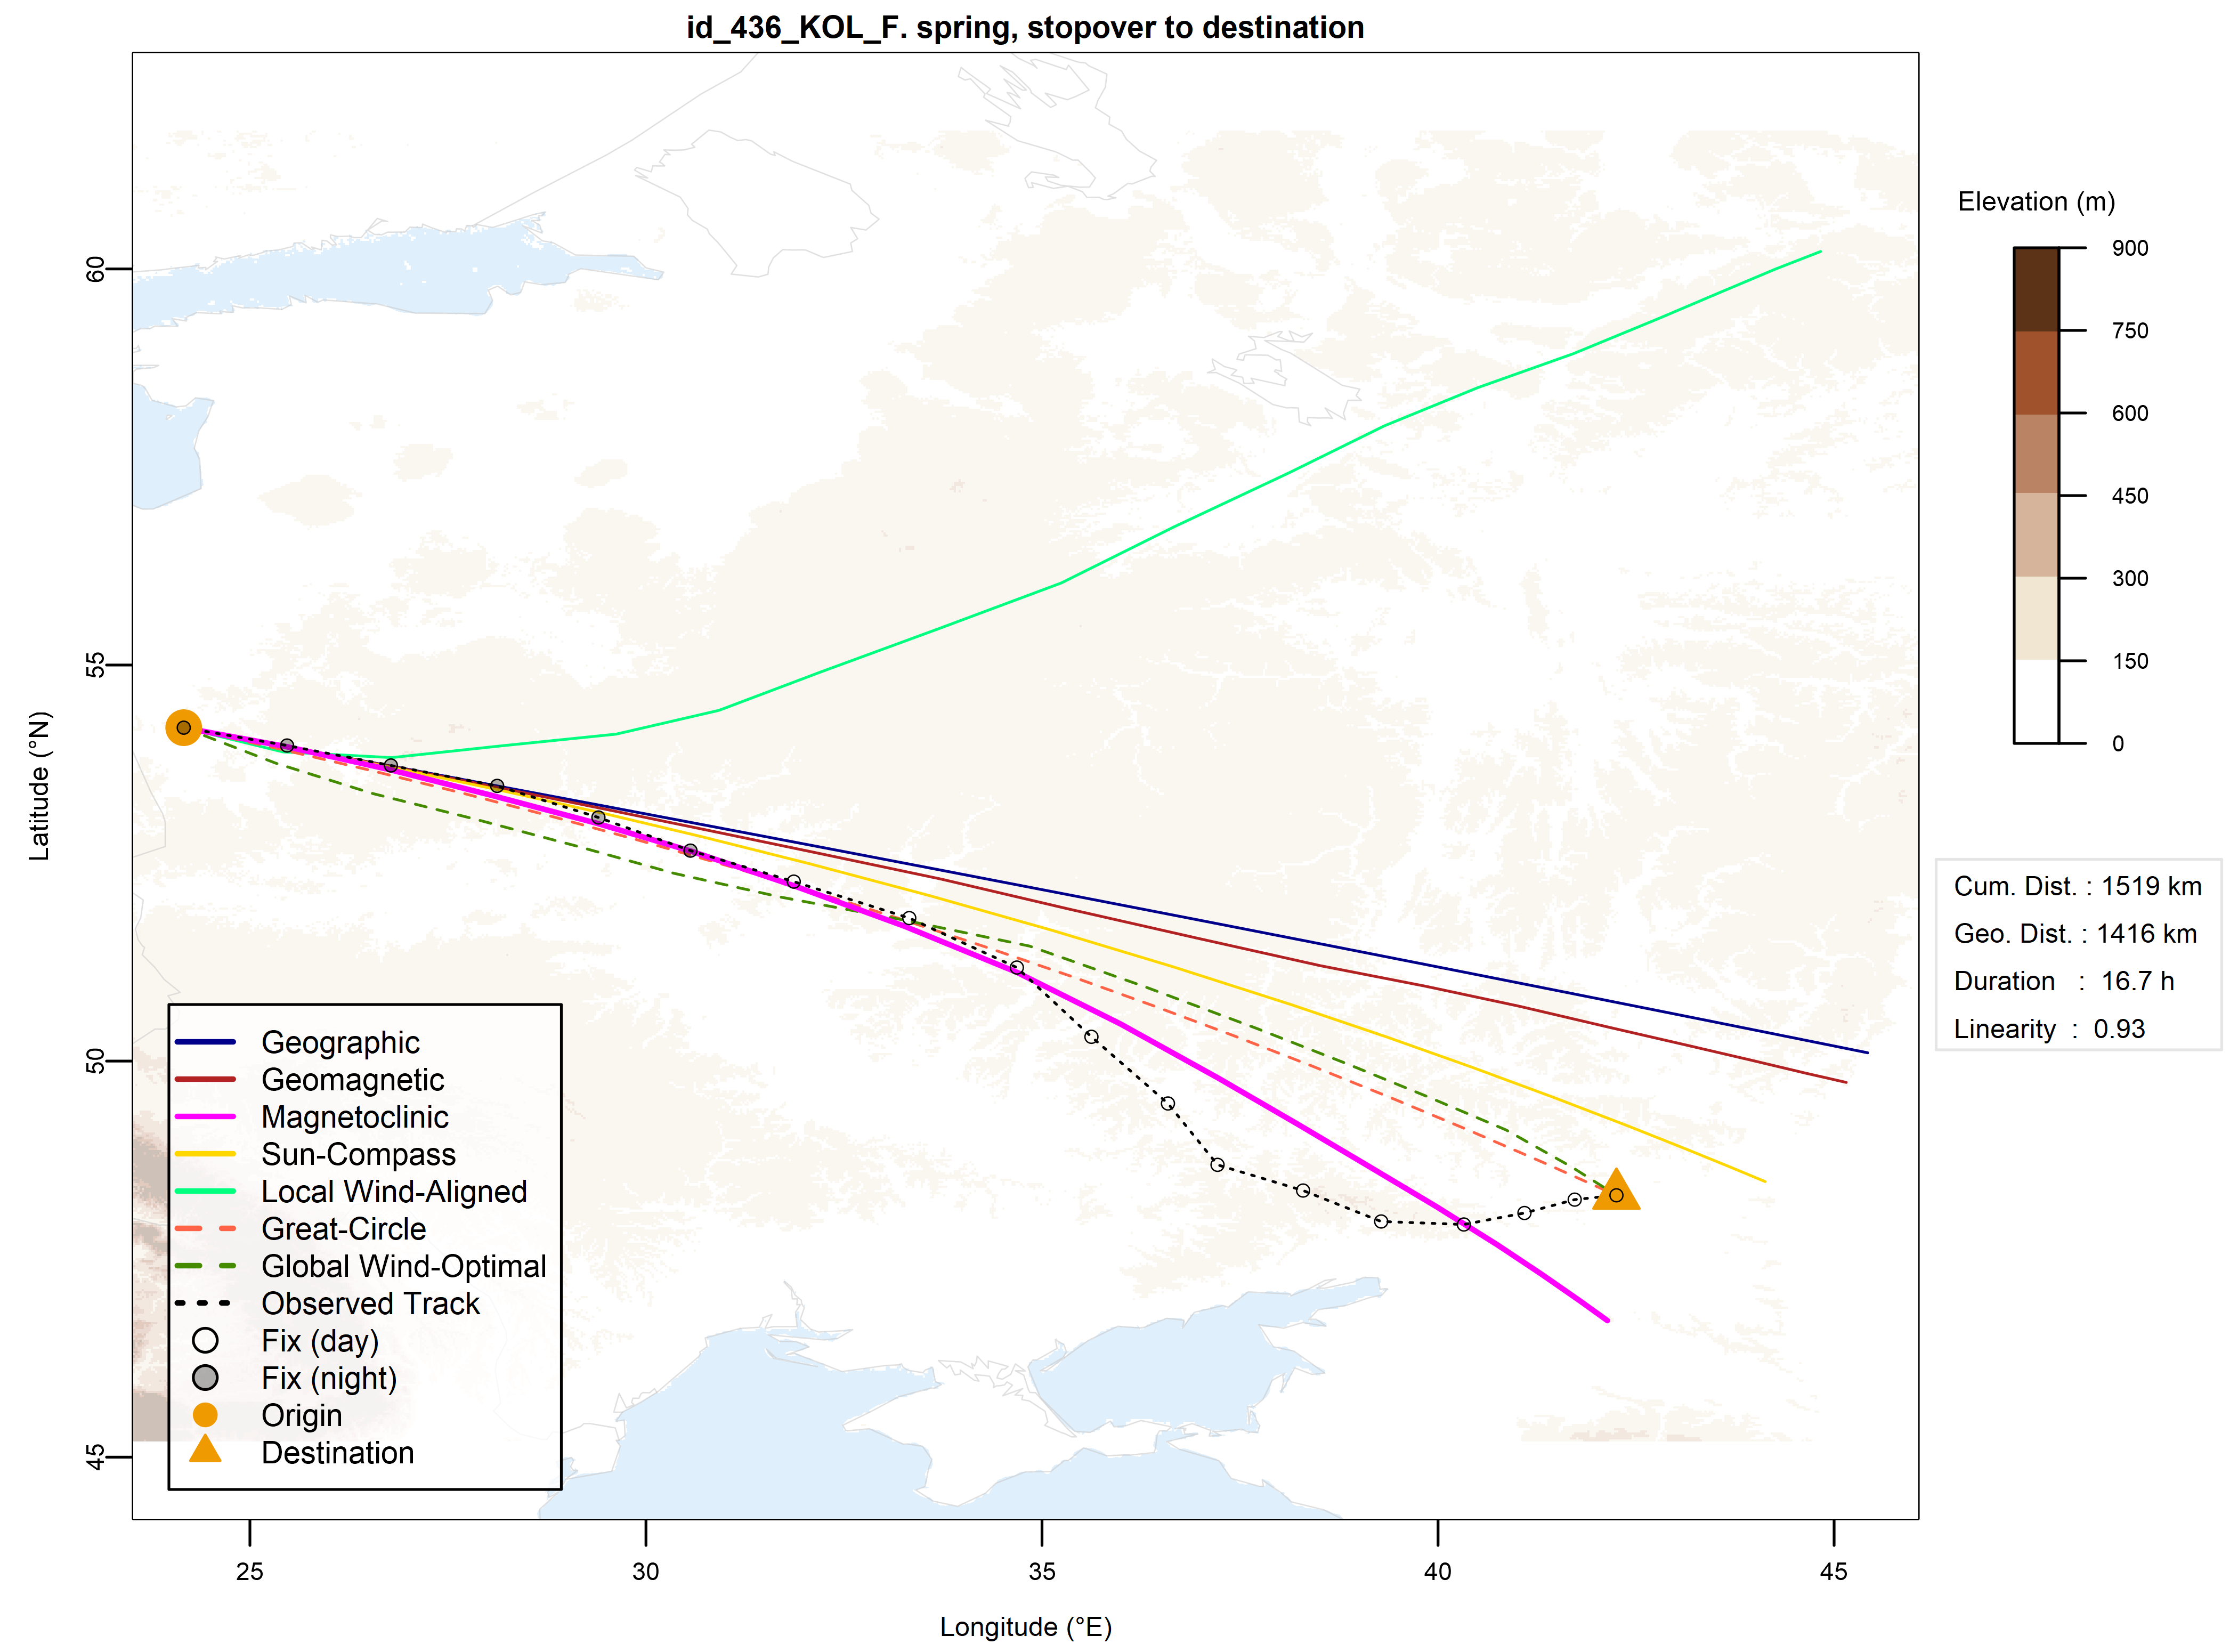 |
| --- |
| Fig. S2. Migratory segment of 1,519 km in spring, with the magnetoclinic trajectory (magenta) displaying the closest match relative to other theoretical paths. The map includes a legend explaining route and symbol types, an info box with segment-level metrics, and elevation shaded in brown. |

| 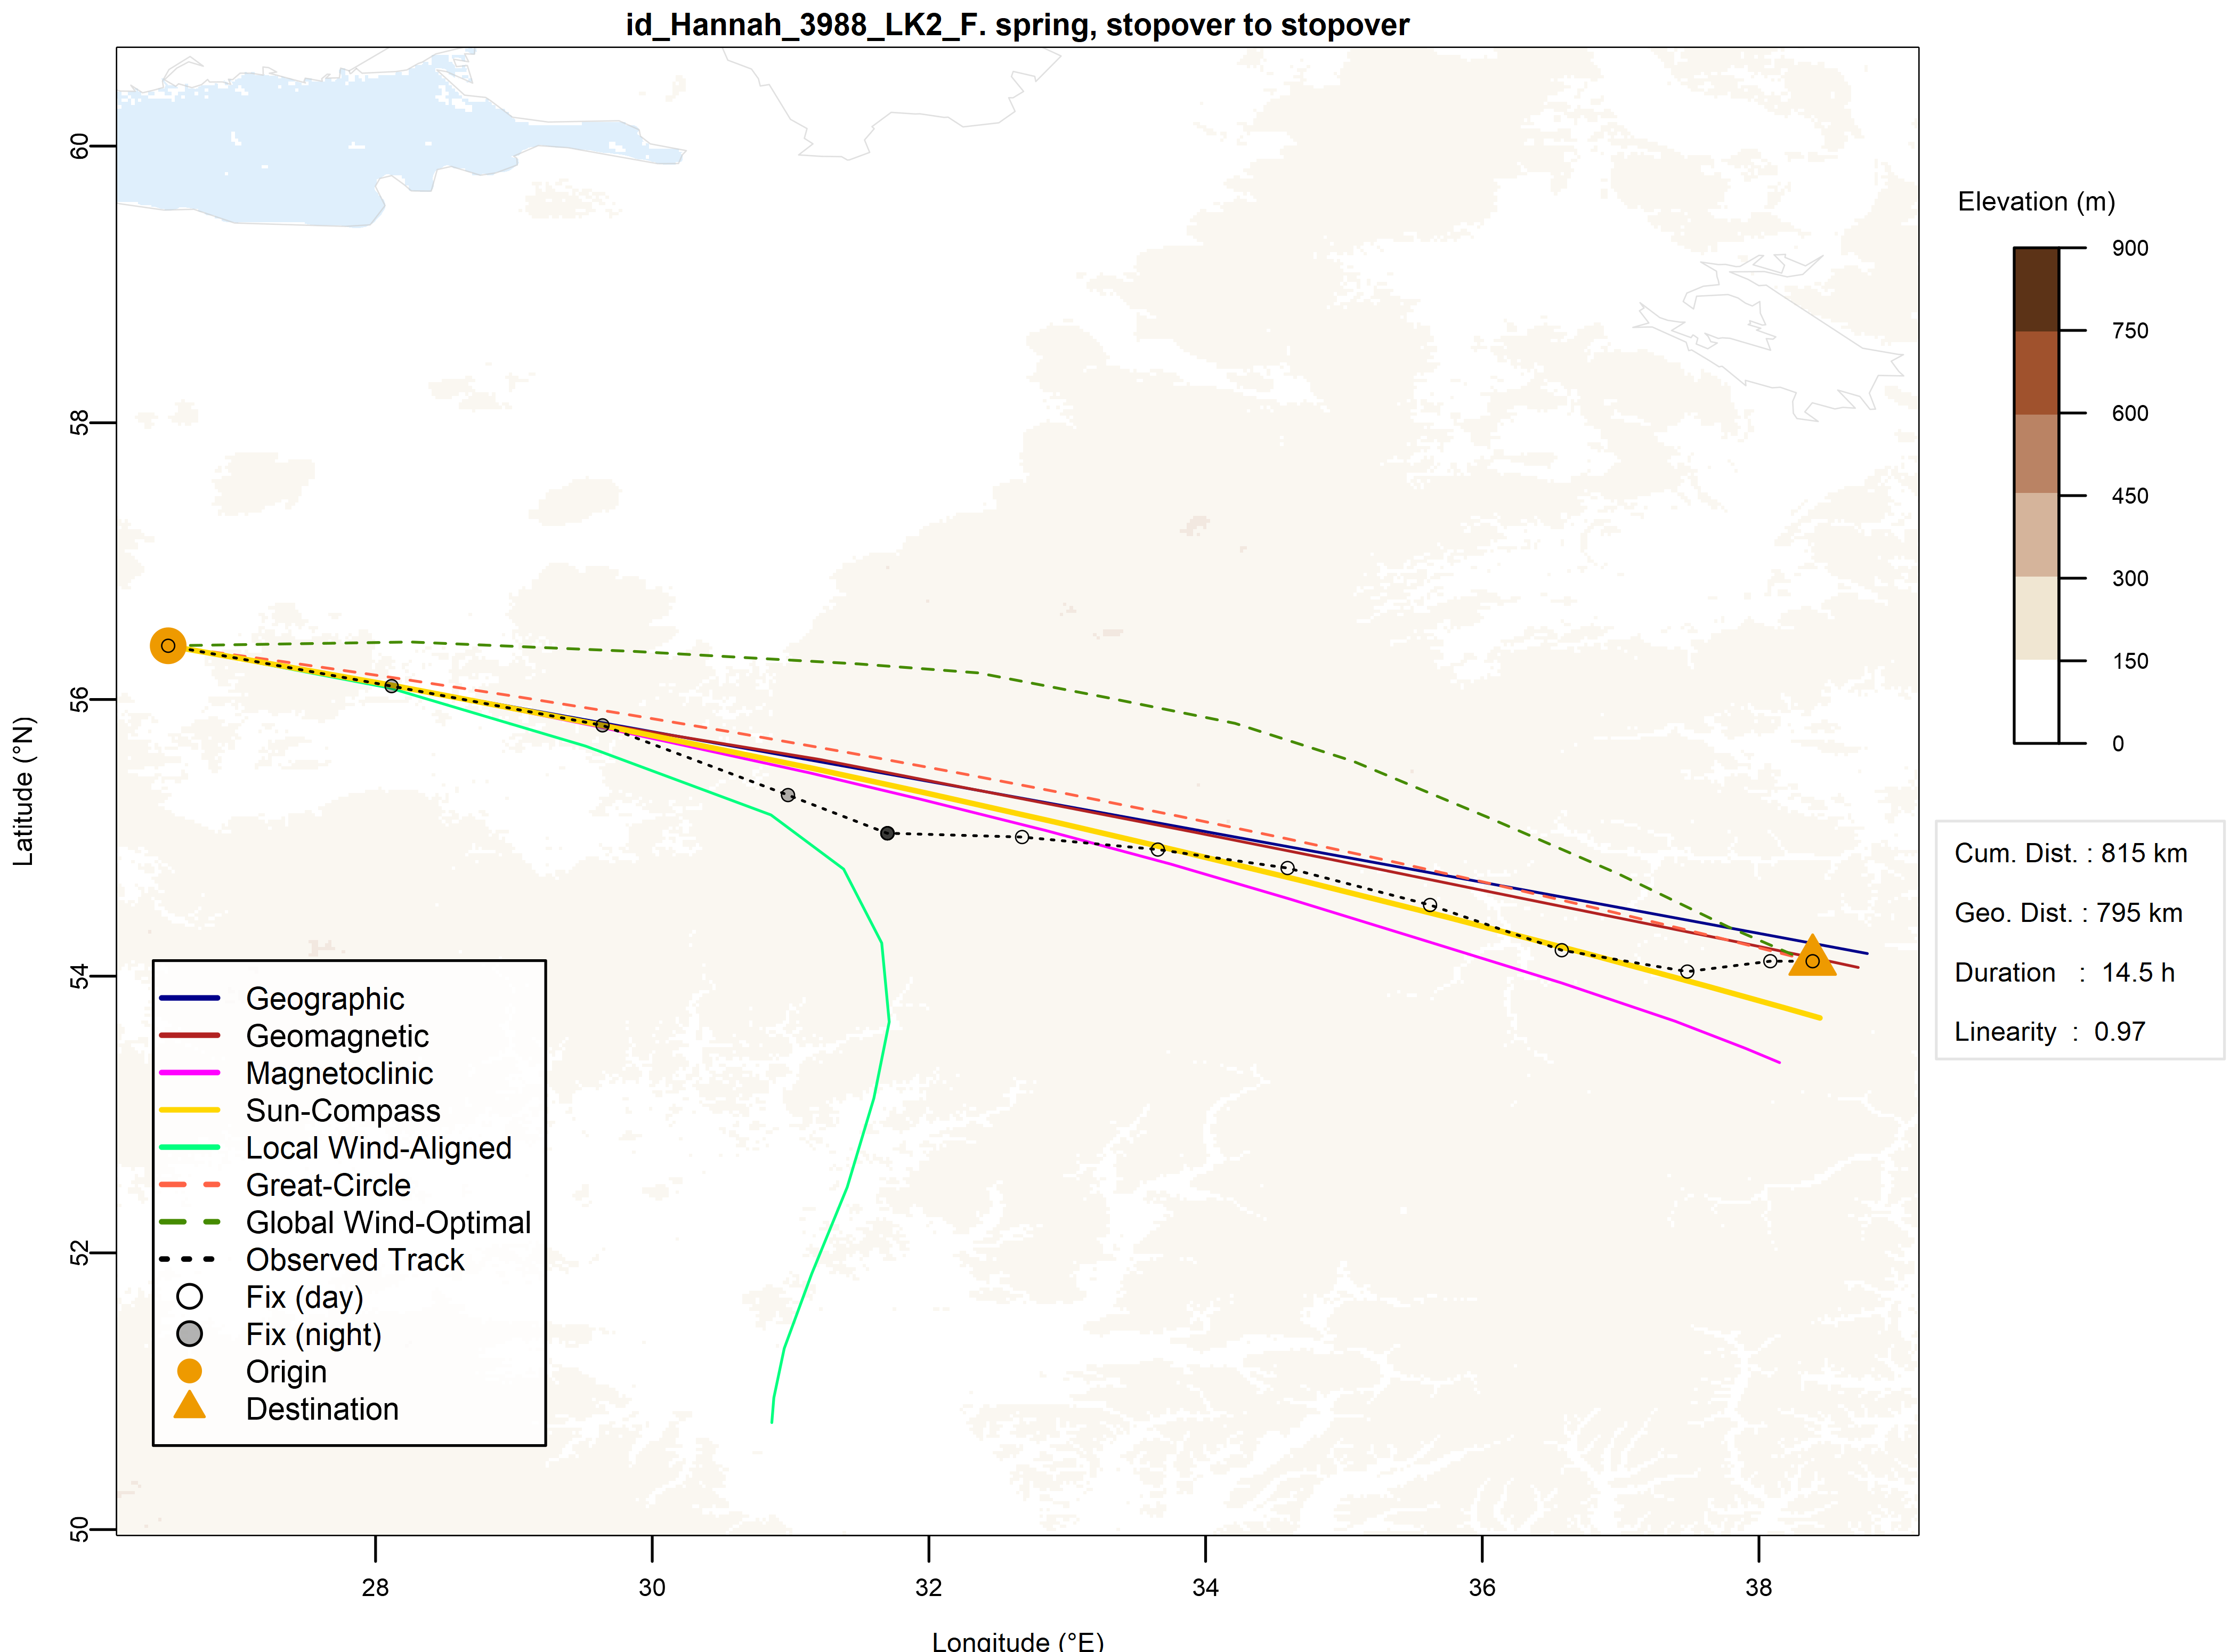 |
| --- |
| Fig. S3. Migratory segment of 815 km in spring, with the sun compass trajectory (yellow) displaying the closest match relative to other theoretical paths. The map includes a legend explaining route and symbol types, an info box with segment-level metrics, and elevation shaded in brown. |

| 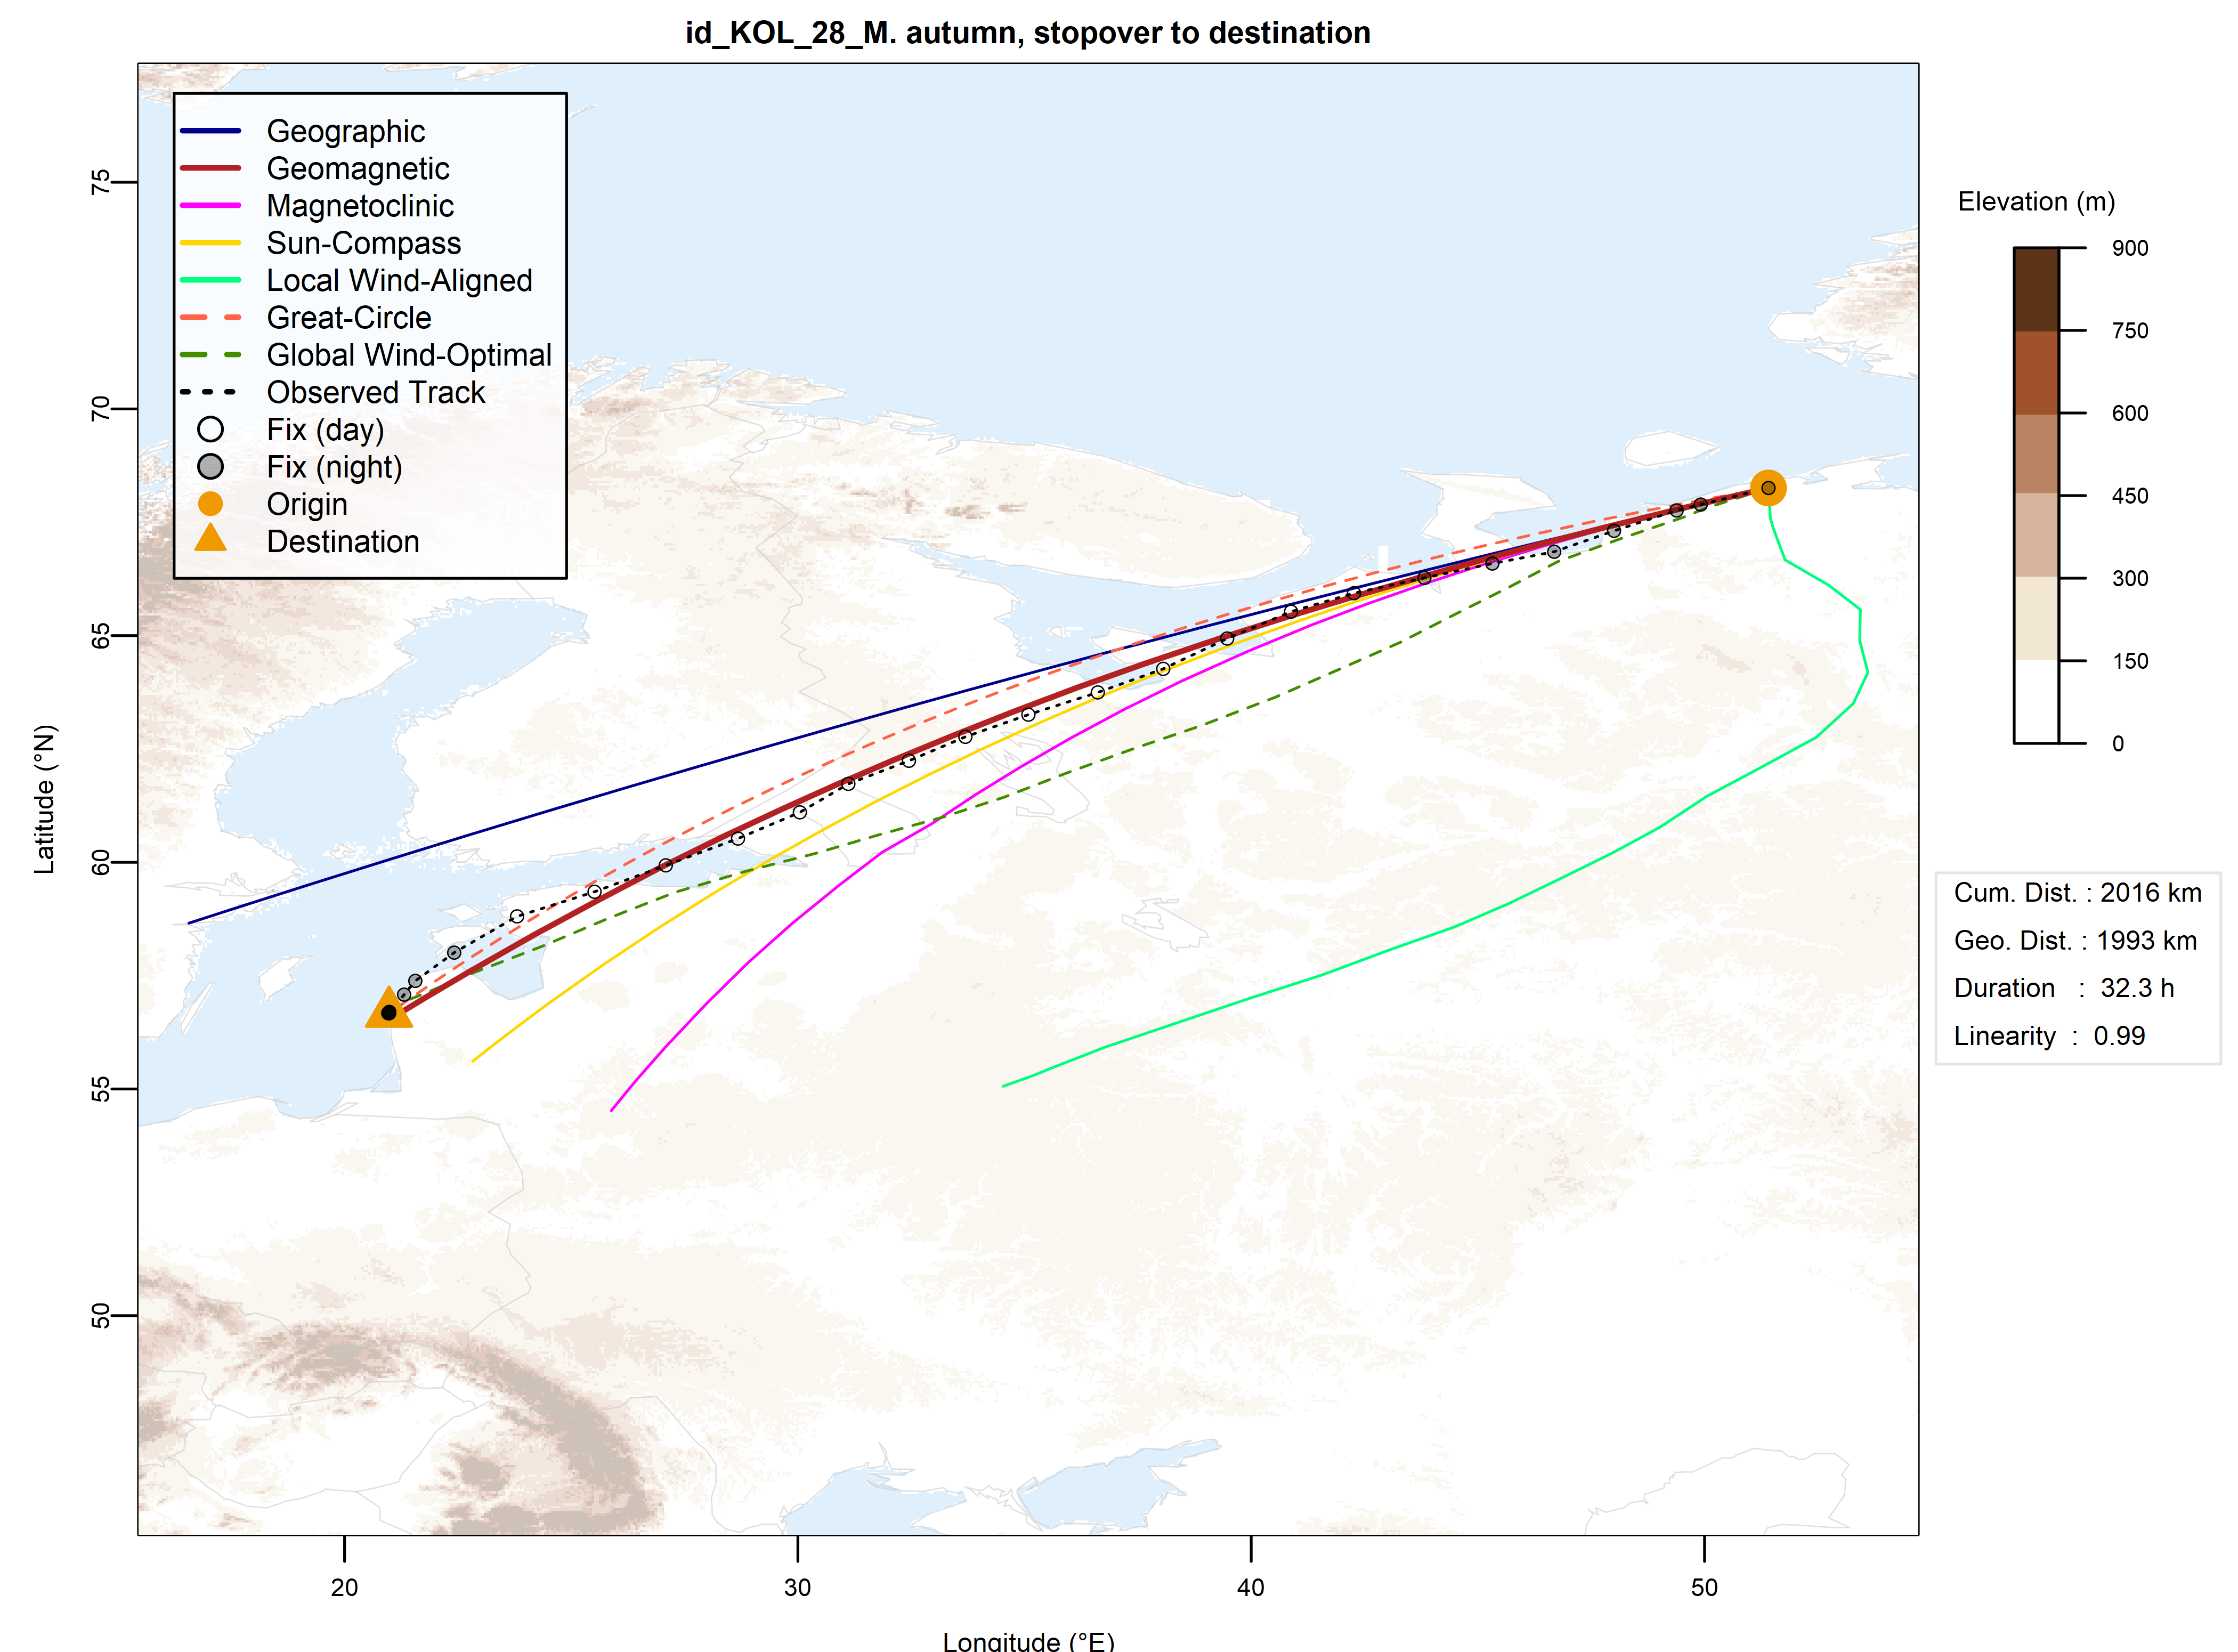 |
| --- |
| Fig. S4. Migratory segment of 2,016 km in spring, with the geomagnetic loxodrome trajectory (dark red) showing the highest alignment among all theoretical routes. The map includes a legend explaining route and symbol types, an info box with segment-level metrics, and elevation shaded in brown. |

| Table S4. Average improvements of best-fitting strategies over runners-up based on MGD similarity. | | | | | | | |
| --- | --- | --- | --- | --- | --- | --- | --- |
| Best-Fitting Strategy | Top Second-Best | Top Second-Best Frequency (%) | | Mean Improvement Over Top Second-Best | | Mean Improvement Over All Second-Best | |
| Autumn | Spring | Autumn | Spring | Autumn | Spring |
| GEO | MAG | 69.9 | 83.9 | 15.2 | 13.9 | 15.6 | 13.7 |
| MAG | GEO | 50.8 | 60.0 | 20.7 | 17.0 | 19.8 | 16.1 |
| MCL | Sun | 75.9 | 72.6 | 21.0 | 20.3 | 18.4 | 19.2 |
| Sun | MCL | 38.5 | 54.8 | 11.6 | 17.9 | 13.0 | 17.9 |
| LW | GEO | 36.7 | 40.0 | 41.2 | 40.3 | 42.3 | 37.5 |

| Table S5. Average improvements of best-fitting strategies over runners-up based on DIR similarity. | | | | | | | |
| --- | --- | --- | --- | --- | --- | --- | --- |
| Best-Fitting Strategy | Top Second-Best | Top Second-Best Frequency (%) | | Mean Improvement Over Top Second-Best | | Mean Improvement Over All Second-Best | |
| Autumn | Spring | Autumn | Spring | Autumn | Spring |
| GEO | MAG | 64.2 | 86.7 | 1.9 | 2.5 | 1.9 | 2.3 |
| MAG | GEO | 72.3 | 59.3 | 2.2 | 49.7 | 1.7 | 29.8 |
| MCL | Sun | 85.1 | 69.1 | 1.1 | 2.3 | 1.2 | 2.8 |
| Sun | MCL | 37.5 | 45.5 | 0.7 | 1.5 | 0.8 | 2.2 |
| LW | GEO | 54.5 | 48.6 | 13.2 | 35.1 | 20.9 | 65.0 |

| Table S6. Pairwise correlations of segment-level similarity scores among compass-based navigation strategies. Values are reported separately for each similarity metric. All pairwise Pearson correlations are statistically significant at p < 0.001. | | | |
| --- | --- | --- | --- |
| Strategy Pair | DTW | MGD | DIR |
| Geographic – Geomagnetic | 0.96 | 0.97 | 1.00 |
| Geographic – Magnetoclinic | 0.84 | 0.85 | 0.99 |
| Geographic – Sun | 0.89 | 0.89 | 1.00 |
| Geographic – Local Wind | 0.41 | 0.44 | 0.42 |
| Geomagnetic – Magnetoclinic | 0.91 | 0.91 | 0.99 |
| Geomagnetic – Sun | 0.95 | 0.95 | 1.00 |
| Geomagnetic – Local Wind | 0.41 | 0.42 | 0.42 |
| Magnetoclinic – Sun | 0.95 | 0.95 | 0.99 |
| Magnetoclinic – Local Wind | 0.45 | 0.45 | 0.42 |
| Sun – Local Wind | 0.42 | 0.43 | 0.42 |

| 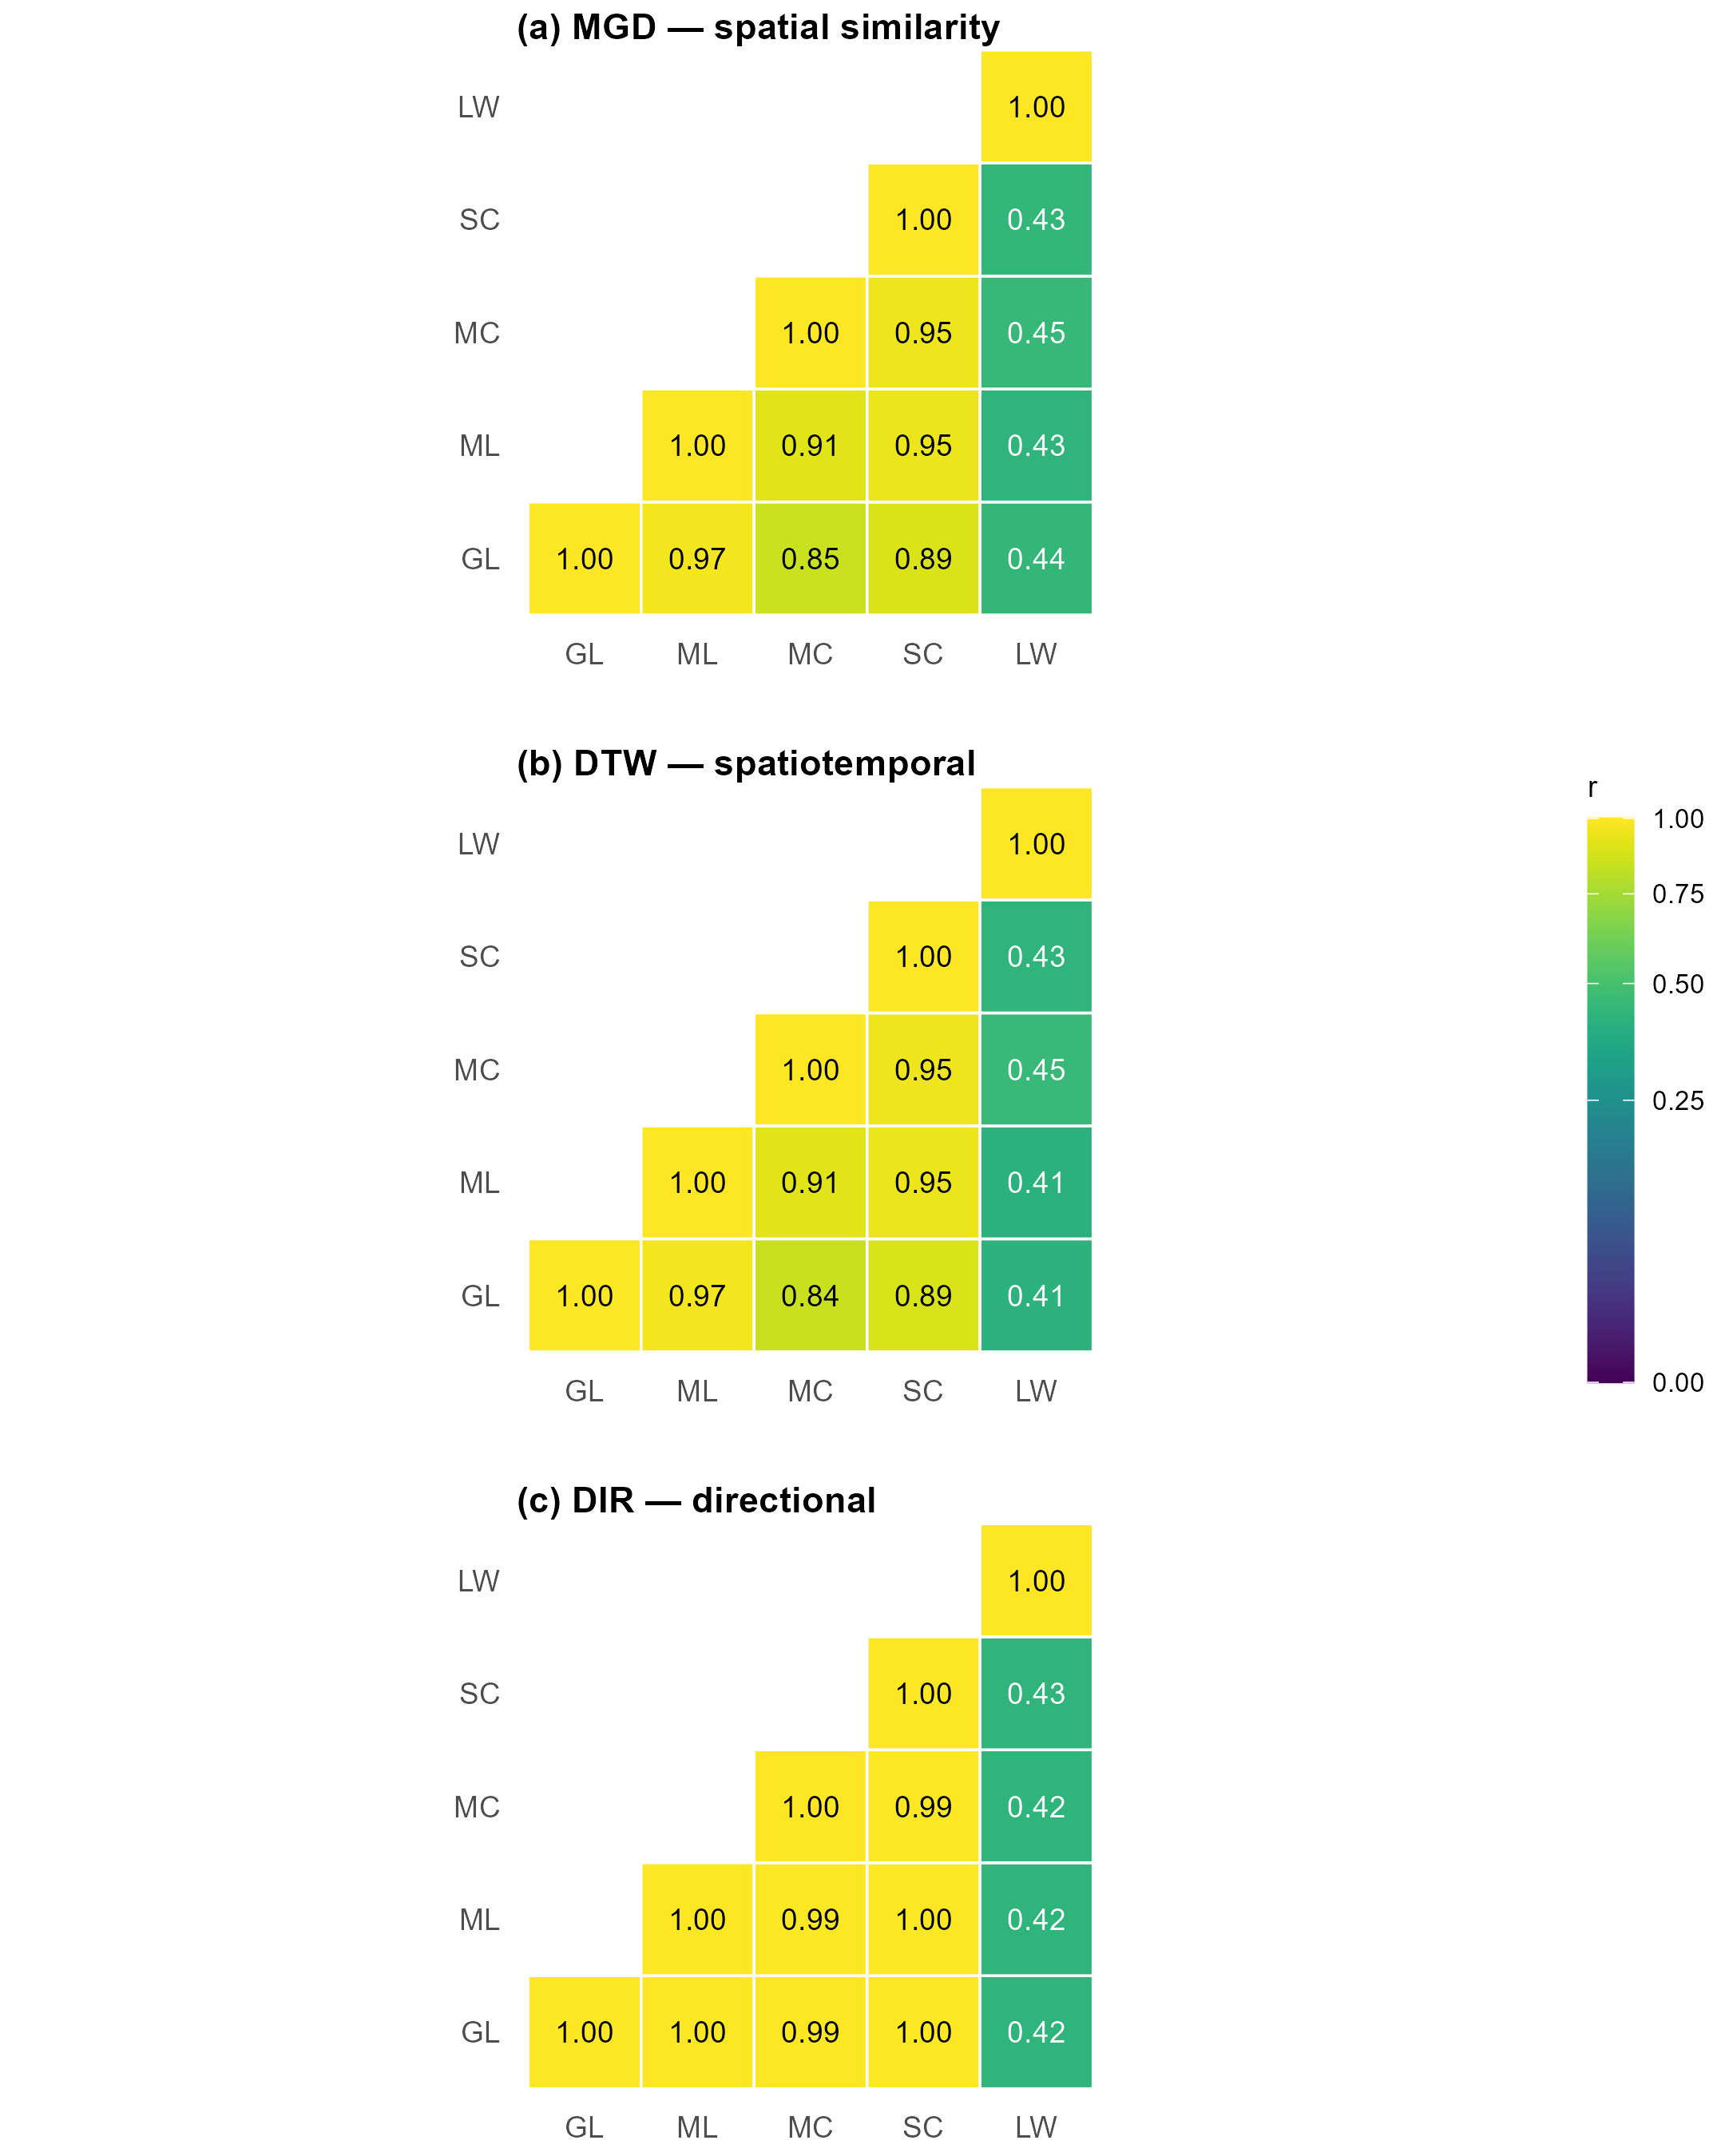 |
| --- |
| Fig. S5. Pearson correlation matrices of evaluation metrics for five compass-based route models (GL, ML, MC, SC, LW). Matrices were computed using (a) median geodesic deviation (MGD), (b) dynamic time warping (DTW), and (c) directional consistency (DIR) as similarity measures. |

| **Table S7.** Binomial logistic regression of route class (wind-optimal vs great-circle). Final model retained after stepwise AIC selection from the full additive model (n = 1,524 segments). Response variable: route class (1 = wind-optimal, 0 = great-circle). Estimates (β) are on the log-odds scale; odds ratios (OR) and 95% profile-likelihood confidence intervals (CI) are provided. Continuous predictors are expressed in native units. Reference levels: season = spring; short pause = absent. Model fit: residual deviance = 2062.9 on 1518 df; AIC = 2074.9; McFadden’s R² = 0.019; Tjur’s R² = 0.026; AUC = 0.59. Calibration was adequate (Hosmer–Lemeshow p = 0.12). | | | | | | |
| --- | --- | --- | --- | --- | --- | --- |
| Predictor | Coding / Unit | β (SE) | z | p | OR | 95 % CI (OR) |
| Intercept | spring; no short pause; tailwind = 0; distance = 0 | −0.510 (0.130) | −3.93 | <0.001 | 0.60 | 0.47–0.77 |
| Season: autumn | vs spring | 0.474 (0.121) | 3.91 | <0.001 | 1.61 | 1.27–2.04 |
| Tailwind support | per 1 m s⁻¹ | 0.077 (0.0185) | 4.17 | <0.001 | 1.08 | 1.04–1.12 |
| Short pause | present vs absent | 0.341 (0.121) | 2.83 | 0.0046 | 1.41 | 1.11–1.78 |
| Great-circle distance | per 1 km | −0.000178 (0.000107) | −1.65 | 0.098 | 1.00 | 1.00–1.00 |
| Next-stopover duration | per 1 h | −0.00239 (0.00169) | −1.41 | 0.158 | 1.00 | 0.99–1.00 |

| Table S8. Variance inflation factors (VIF) | |
| --- | --- |
| Predictor | VIF |
| Season (autumn) | 1.03 |
| Tailwind support (m s⁻¹) | 1.12 |
| Great-circle distance (km) | 1.10 |
| Short pause in sustained flight | 1.20 |
| Next-stopover duration (h) | 1.04 |

| Table S9. Stepwise AIC selection path | | | | | | |
| --- | --- | --- | --- | --- | --- | --- |
| Step | Predictor removed | ΔDf | ΔDeviance | Residual df | Residual deviance | AIC |
| — | — (full model) | — | — | 1511 | 2059.313 | 2085.313 |
| 1 | Segment type | 2 | 0.768 | 1513 | 2060.081 | 2082.081 |
| 2 | Segment duration | 1 | 0.066 | 1514 | 2060.147 | 2080.147 |
| 3 | Geomagnetic storm indicator | 1 | 0.178 | 1515 | 2060.325 | 2078.325 |
| 4 | Light at start | 1 | 0.536 | 1516 | 2060.860 | 2076.860 |
| 5 | Previous stopover duration | 1 | 0.727 | 1517 | 2061.587 | 2075.587 |
| 6 | Crosswind | 1 | 1.290 | 1518 | 2062.877 | 2074.877 |

| Table S10. Overall fit and performance of the final multinomial logistic regression model of compass class (n = 1,524 segments). Geographic served as the baseline category. Predictors retained after stepwise AIC selection were: season, mean wind support, mean crosswind, great-circle distance, segment duration, light at start, segment type, and short pause. Continuous predictors are in native units; categorical predictors are shown relative to reference levels (spring, day, origin→stopover, short pause absent). | |
| --- | --- |
| **Statistic** | **Value** |
| Residual deviance | 4342.2 |
| AIC | 4422.2 |
| McFadden’s R² | 0.056 |
| Multiclass AUC (Hand–Till) | 0.643 |
| Overall accuracy (micro-recall) | 39.0% |
| Macro-recall | 0.266 |

| Table S11. Class-wise effects relative to the geographic baseline. Odds ratios (OR), 95% Wald confidence intervals, and p-values from the final multinomial model. Continuous predictors in native units; categorical predictors shown relative to reference levels (spring, day, origin→stopover, short pause absent). p-values smaller than 0.0001 are reported as “< 0.0001”. | | | | |
| --- | --- | --- | --- | --- |
| **Class** | **Predictor** | **OR** | **95% CI (OR)** | **p** |
| Geomagnetic | (Intercept) | 0.318 | 0.180–0.563 | < 0.0001 |
| Season: autumn (vs spring) | 1.140 | 0.783–1.660 | 0.497936 |
| Tailwind support (per 1 m s⁻¹) | 0.988 | 0.927–1.050 | 0.708245 |
| Crosswind (per 1 m s⁻¹) | 1.030 | 0.931–1.140 | 0.581742 |
| Great-circle distance (per 1 km) | 1.000 | 1.000–1.000 | 0.661195 |
| Segment duration (per 1 h) | 1.000 | 0.994–1.010 | 0.812472 |
| Light at start: night (vs day) | 0.782 | 0.489–1.250 | 0.303235 |
| Segment type: stopover → destination | 0.847 | 0.508–1.410 | 0.524552 |
| Segment type: stopover → stopover | 0.869 | 0.579–1.300 | 0.499287 |
| Short pause: present (vs absent) | 1.030 | 0.661–1.610 | 0.887555 |
| Magnetoclinic | (Intercept) | 1.660 | 1.050–2.630 | 0.031061 |
| Season: autumn (vs spring) | 0.678 | 0.493–0.934 | 0.017330 |
| Tailwind support (per 1 m s⁻¹) | 0.953 | 0.907–1.000 | 0.062344 |
| Crosswind (per 1 m s⁻¹) | 1.080 | 1.000–1.170 | 0.046130 |
| Great-circle distance (per 1 km) | 1.000 | 0.999–1.000 | 0.032215 |
| Segment duration (h) | 0.996 | 0.990–1.000 | 0.170655 |
| Light at start: night (vs day) | 1.750 | 1.270–2.420 | 0.000664 |
| Segment type: stopover → destination | 0.375 | 0.245–0.574 | < 0.0001 |
| Segment type: stopover → stopover | 0.457 | 0.336–0.622 | < 0.0001 |
| Short pause: present (vs absent) | 0.769 | 0.541–1.090 | 0.141158 |
| Sun | (Intercept) | 0.443 | 0.263–0.747 | 0.002272 |
| Season: autumn (vs spring) | 0.694 | 0.489–0.987 | 0.041805 |
| Tailwind support (per 1 m s⁻¹) | 1.000 | 0.951–1.060 | 0.850773 |
| Crosswind (per 1 m s⁻¹) | 1.010 | 0.925–1.100 | 0.821071 |
| Great-circle distance (per 1 km) | 1.000 | 1.000–1.000 | 0.308374 |
| Segment duration (per 1 h) | 1.000 | 0.994–1.010 | 0.923707 |
| Light at start: night (vs day) | 0.770 | 0.514–1.150 | 0.204741 |
| Segment type: stopover → destination | 1.190 | 0.751–1.880 | 0.458237 |
| Segment type: stopover → stopover | 1.110 | 0.760–1.630 | 0.578548 |
| Short pause: present (vs absent) | 0.828 | 0.561–1.220 | 0.339403 |
| Local wind | (Intercept) | 0.197 | 0.112–0.346 | < 0.0001 |
| Season: autumn (vs spring) | 0.311 | 0.190–0.508 | < 0.0001 |
| Tailwind support (per 1 m s⁻¹) | 1.360 | 1.270–1.450 | < 0.0001 |
| Crosswind (per 1 m s⁻¹) | 0.774 | 0.685–0.873 | < 0.0001 |
| Great-circle distance (per 1 km) | 0.999 | 0.999–1.000 | 0.000250 |
| Segment duration (per 1 h) | 1.010 | 1.010–1.020 | < 0.0001 |
| Light at start: night (vs day) | 0.851 | 0.543–1.330 | 0.482819 |
| Segment type: stopover → destination | 1.000 | 0.598–1.680 | 0.996763 |
| Segment type: stopover → stopover | 1.560 | 1.060–2.300 | 0.025730 |
| Short pause: present (vs absent) | 2.060 | 1.280–3.320 | 0.002837 |

| Table S12. Variance inflation factors (VIF) for candidate predictors, computed from a dummy-response linear model with the full predictor set (outcome-agnostic). | | | |
| --- | --- | --- | --- |
| **Predictor** | **GVIF** | **Df** | **GVIF^(1/(2·Df))** |
| Season | 1.05 | 1 | 1.02 |
| Tailwind support (m s⁻¹) | 1.18 | 1 | 1.09 |
| Crosswind (m s⁻¹) | 1.06 | 1 | 1.03 |
| Great-circle distance (km) | 1.42 | 1 | 1.19 |
| Segment duration (h) | 1.79 | 1 | 1.34 |
| Previous stopover duration (h) | 2.00 | 1 | 1.42 |
| Next stopover duration (h) | 1.23 | 1 | 1.11 |
| Geomagnetic storm | 1.07 | 1 | 1.03 |
| Light at start | 1.09 | 1 | 1.04 |
| Segment type (2 df) | 2.47 | 2 | 1.25 |
| Short pause | 1.51 | 1 | 1.23 |

| Table S13. Stepwise AIC selection path (analysis of deviance table) from the initial full multinomial model to the final retained model. Each step shows the predictor removed, associated change in deviance (ΔDeviance) and degrees of freedom (ΔDf), and the resulting residual deviance and AIC. | | | | | | |
| --- | --- | --- | --- | --- | --- | --- |
| Step | Predictor removed | ΔDf | ΔDeviance | Residual df | Residual deviance | AIC |
| — | initial full model | — | — | 1472 | 4322.384 | 4426.384 |
| 2 | – Next stopover duration | 4 | 6.333351 | 1476 | 4328.717 | 4424.717 |
| 3 | – Geomagnetic storm indicator | 4 | 6.202074 | 1480 | 4334.919 | 4422.919 |
| 4 | – Previous stopover duration | 4 | 7.259030 | 1484 | 4342.179 | 4422.179 |
